# Supplementary material
Source: PubMed Central journal article supplement (PMC7959522)

### Supplementary Figure 1 | Cell cycle effects of POLD depletion.

(A) Schematic of the ZITR assay. Top panel: *AAVSI* locus with zinc finger nuclease (ZFN) cut site downstream of the endogenous promoter; cassette of promoter-less *GFP* transgene downstream of an *AAVSI* recognition site integrated on a heterologous chromosome. Bottom panel: Chromosomal translocation juxtaposes the endogenous *AAVSI* promoter with *GFP* transgene leading to GFP expression. Scissors, *AAVSI* ZFNs. Dotted lines, targeted cutting at *AAVSI* recognition sequences. (B) Schematic of the CRITR assay. Top two panels: endogenous *CD71* and *CD4* loci showing the orientation of the *CD71* promoter and the *CD4* open reading frame (ORF) on human chromosomes 3 (chr3, green) and 12 (chr12, blue) respectively. DNA sequences targeted by the *CD71* and *CD4* CRISPR gRNAs are shown by orange lines, PAM sequence indicated by red letters, CRISPR/Cas9 cut site indicated by pink dotted lines. Bottom panel: Sequence of translocation junction without any end processing (referred to as 'exact'). Translocation juxtaposes the *CD71* promoter with the *CD4* ORF leading to the expression of the *CD4* gene, which is quantified by flow cytometry. (C) Cell cycle dynamics for 293T cells transfected with control non-targeting siRNA (siCTRL) or siPOLD2 #1 or #2. Data are presented as mean  $\pm$  Standard Error (SE) of n=3. *P* values calculated using a one-way ANOVA with Tukey's correction. \**P* < 0.05, \*\**P* < 0.01, \*\*\**P* < 0.001, \*\*\*\**P* < 0.0001.

### Supplementary Figure 2 | Single antibody controls for PLA assays.

Proximity ligation assay (PLA) using antibodies against the indicated targets at 2 hours following 10 Gy ionizing radiation (IR) or mock treatment.

### Supplementary Figure 3 | POLD-dependent CD4/CD71 translocation junctions.

(A) Alignment of insertion sequences  $\geq$  20 bp from CD4/CD71 translocation junctions in 293T cells. (B) Deletion lengths and (C) microhomology usage at CRISPR/Cas9-mediated CD4/CD71 translocation junctions in 293T cells. Deletion lengths include complex junctions (i.e. junctions with both sequence

loss and gain). Data are combined from three independent experiments. *P* values calculated using a Student's *t*-test (*B*) or two-way ANOVA with Tukey's correction (*C*). There were no significant differences.

#### **Supplementary Figure 4 | Linear PCR for Hi-FIBR**

Optimization of linear PCR to produce *CD4* and *ESR1* amplicons for deep sequencing and Hi-FIBR analysis.

#### **Supplementary Figure 5 | POLD1 mutants in intrachromosomal repair**

Hi-FIBR analysis of (*A*) DSB repair classes, (*B*) microhomology usage, (*C*) deletion and (*D*) insertion lengths for intrachromosomal repair of CRISPR/Cas9-induced DSB in the *ESR1* locus in 293T cells transduced with siRNA-resistant POLD1 WT, D316G, or S605del or empty vector (EV). Cells were transfected with siCTRL or siPOLD1 #2 and 72 hrs later transfected with the same siRNA and Cas9/gRNA targeting *ESR1*. DNA was harvested 48 hrs later. (*E*) Deletion and (*F*) insertion lengths for intrachromosomal repair of CRISPR/Cas9-induced DSB in the *CD4* locus in 293T cells, as in (*C,D*). Data are presented as mean  $\pm$  SE of  $n = 3$  independent experiments. *P* values calculated using a two-way ANOVA (*A,B*) or one-way ANOVA with Tukey's correction (*C-F*). \**P* < 0.05, \*\**P* < 0.01, \*\*\**P* < 0.001, \*\*\*\**p*<0.001.

#### **Supplementary Figure 6 | Alt-NHEJ factors in intrachromosomal repair**

(*A*) Relative proliferation of 293T cells 5 days after transfection with the indicated siRNA. CTRL, non-targeting control siRNA; D2, siPOLD2 #1; Q, POLQ; LIG3, Ligase 3; B, POLB. (*B*) RT-qPCR for the indicated transcripts. B, POLB; D2, POLD2 #1. (*C,D*) DSB repair class and microhomology usage for intrachromosomal repair of CRISPR/Cas9-induced DSB in the *CD4* locus in 293T cells. Cells were transfected with the indicated siRNA and 72

hrs later transfected with the same siRNA and Cas9/gRNA targeting *CD4*. DNA was harvested 48 hrs later. Data are presented as mean  $\pm$  SE of  $n = 3$  independent experiments. *P* values calculated using a one-way (*A,B*) or two-way (*C,D*) ANOVA with Tukey's correction. \**P* < 0.05, \*\**P* < 0.01, \*\*\**P* < 0.001, \*\*\*\**P* < 0.0001.

| siRNA   | Vector        | Replicate | Total Reads | Threshold Reads | Excluded Reads | % Excluded  | Exact Reads | Deletion Reads | Complex Reads | Insertion Reads |
|---------|---------------|-----------|-------------|-----------------|----------------|-------------|-------------|----------------|---------------|-----------------|
| None    | Empty No Cas9 | 1         | 55982       | 55862           | 120            | 0.214354614 | 55294       | 0              | 568           | 0               |
| None    | Empty         | 2         | 85966       | 76735           | 9231           | 10.73796617 | 30537       | 36321          | 3398          | 6479            |
| None    | Empty         | 3         | 97867       | 86997           | 10870          | 11.1069104  | 36548       | 38978          | 3828          | 7643            |
| None    | POLD2         | 1         | 96149       | 86072           | 10077          | 10.48060822 | 31081       | 43077          | 3711          | 8203            |
| None    | POLD2         | 2         | 79881       | 70727           | 9154           | 11.45954607 | 28318       | 33268          | 2802          | 6339            |
| None    | POLD2         | 3         | 67300       | 58490           | 8810           | 13.09063893 | 23450       | 27509          | 2126          | 5405            |
| siCTRL  | Empty         | 1         | 86593       | 76674           | 9919           | 11.45473653 | 32296       | 35057          | 3383          | 5938            |
| siCTRL  | Empty         | 2         | 99019       | 85538           | 13481          | 13.61455882 | 31204       | 41680          | 4338          | 8316            |
| siCTRL  | Empty         | 3         | 109294      | 97263           | 12031          | 11.00792358 | 42345       | 42556          | 4593          | 7769            |
| siCTRL  | POLD2         | 1         | 36011       | 30451           | 5560           | 15.43972675 | 12092       | 14674          | 1006          | 2679            |
| siCTRL  | POLD2         | 2         | 38304       | 32226           | 6078           | 15.86779449 | 12879       | 15125          | 1154          | 3068            |
| siCTRL  | POLD2         | 3         | 98128       | 85023           | 13105          | 13.35500571 | 31212       | 41952          | 3802          | 8057            |
| siPOLD2 | Empty         | 1         | 65698       | 57721           | 7977           | 12.14192213 | 32299       | 18877          | 1892          | 4653            |
| siPOLD2 | Empty         | 2         | 51860       | 45148           | 6712           | 12.9425376  | 25544       | 14326          | 1357          | 3921            |
| siPOLD2 | Empty         | 3         | 66449       | 59022           | 7427           | 11.17699288 | 34810       | 17734          | 1832          | 4646            |
| siPOLD2 | POLD2         | 1         | 91830       | 80245           | 11585          | 12.61570293 | 29380       | 39873          | 3859          | 7133            |
| siPOLD2 | POLD2         | 2         | 81416       | 71013           | 10403          | 12.77758672 | 29965       | 32627          | 3011          | 5410            |
| siPOLD2 | POLD2         | 3         | 121372      | 107042          | 14330          | 11.80667699 | 43787       | 50141          | 4706          | 8408            |

Supplementary Table 1. NGS read counts from the *CD4* locus. Total Reads: The total number of reads in each file following Mapping and Hi-FiBR analysis. Threshold Reads: The number of reads remaining after excluding sequences represented by <10 reads. Excluded reads: The number of reads excluded from the dataset because the sequences were represented by <10 reads. % Excluded = 100\*Excluded Reads/Total Reads. Exact reads: The number of reads corresponding to perfect repair. Deletion Reads: The number of reads corresponding to simple deletions. Complex Reads: The number of reads corresponding to complex repair. Insertion Reads: The number of reads corresponding to simple insertions.

| siRNA   | Vector | Replicate | Total Reads | Threshold Reads | Excluded Reads | % Excluded  | Exact Reads | Deletion Reads | Complex Reads | Insertion Reads |
|---------|--------|-----------|-------------|-----------------|----------------|-------------|-------------|----------------|---------------|-----------------|
| CTRL    | Empty  | 1         | 43354       | 40245           | 3109           | 7.171195276 | 12757       | 22725          | 1179          | 3584            |
| CTRL    | Empty  | 2         | 54167       | 50596           | 3571           | 6.592574815 | 17064       | 27755          | 1655          | 4122            |
| CTRL    | Empty  | 3         | 78774       | 73969           | 4805           | 6.099728337 | 21768       | 42635          | 2744          | 6822            |
| siPOLD2 | Empty  | 1         | 84736       | 79748           | 4988           | 5.886518127 | 34193       | 34895          | 3020          | 7640            |
| siPOLD2 | Empty  | 2         | 33425       | 30928           | 2497           | 7.470456245 | 13542       | 13365          | 851           | 3170            |
| siPOLD2 | Empty  | 3         | 42101       | 39212           | 2889           | 6.862069785 | 16216       | 16824          | 1285          | 4887            |

Supplementary Table 2. NGS read counts from the *ESRI* locus. As in Supplementary table 1.

| CD4 Proximal Junctions |           |                       |               |       |        |       |         |       |
|------------------------|-----------|-----------------------|---------------|-------|--------|-------|---------|-------|
| Left Alignment         | Insertion | Right Alignment       | Untransfected |       | siCTRL |       | siPOLD2 |       |
|                        |           |                       | Empty         | POLD2 | Empty  | POLD2 | Empty   | POLD2 |
| TATACAGGATGCTACCGTA    |           | CTAGGGTAAGACACCTCTG   | Empty         | POLD2 | Empty  | POLD2 | Empty   | POLD2 |
| TATACAGGATGCTACCGTA    |           | CTAGGGTAAGACACCTCTG   | 36.57         | 34.05 | 35.89  | 32.58 | 50.35   | 35.01 |
| TATACAGGATGCTACCGTA    | A         | CTAGGGTAAGACACCTCTG   | 5.22          | 5.64  | 4.87   | 5.55  | 5.09    | 4.85  |
| TATACAGGATGCTACCGTA    |           | -----AGACACCTCTG      | 7.19          | 7.29  | 6.65   | 6.86  | 4.33    | 6.92  |
| TATACAGGATGCTA-----    |           | -----GGGTAAGACACCTCTG | 6.56          | 7.43  | 6.24   | 7.22  | 3.62    | 6.53  |
| TATACAGGATGCTACCGTA    |           | -----GGGTAAGACACCTCTG | 4.71          | 4.23  | 5.03   | 4.84  | 3.42    | 5.01  |
| TATACAGGATGCTACCGTA    |           | --TAGGGTAAGACACCTCTG  | 1.37          | 1.30  | 1.38   | 1.26  | 1.29    | 1.22  |
| TATACAGGATGCTACC-----  |           | --TAGGGTAAGACACCTCTG  | 2.34          | 2.52  | 2.29   | 2.58  | 1.24    | 2.62  |
| TATACAGGATGCTACCGT--   |           | CTAGGGTAAGACACCTCTG   | 0.92          | 0.93  | 0.99   | 1.06  | 1.00    | 1.06  |
| TATACAGGATGCTACCGTA    |           | -----TAAGACACCTCTG    | 0.84          | 0.94  | 0.81   | 0.90  | 0.94    | 0.89  |
| TATACAGGATGCTACCGTA    |           | -----GACACCTCTG       | 0.80          | 0.79  | 0.72   | 0.82  | 0.70    | 0.76  |
| TATACAGGATGCTAC-----   |           | --TAGGGTAAGACACCTCTG  | 0.70          | 0.83  | 0.74   | 0.82  | 0.59    | 0.79  |
| TATACAGGATGCTACCGTA    |           | ---AGGGTAAGACACCTCTG  | 0.55          | 0.46  | 0.56   | 0.47  | 0.51    | 0.46  |
| TATACAGGATGCTACCG----  |           | CTAGGGTAAGACACCTCTG   | 0.58          | 0.52  | 0.64   | 0.59  | 0.50    | 0.52  |
| TATACAGGATGCTACCGTA    | T         | CTAGGGTAAGACACCTCTG   | 0.54          | 0.59  | 0.48   | 0.63  | 0.47    | 0.49  |
| TATACAGGATGCTACCGTA    |           | -----ACACCTCTG        | 0.50          | 0.58  | 0.50   | 0.57  | 0.43    | 0.56  |
| TATACAGGATGCTACC-----  |           | CTAGGGTAAGACACCTCTG   | 0.90          | 0.88  | 0.95   | 0.89  | 0.43    | 1.00  |
| TATACAGGATGCTACCGTA    | CTA       | -----GGTAAGACACCTCTG  | 0.57          | 0.41  | 0.63   | 0.57  | 0.42    | 0.49  |
| TATACAGGATGCTACCGTA    | G         | CTAGGGTAAGACACCTCTG   | 0.48          | 0.52  | 0.55   | 0.63  | 0.42    | 0.52  |
| TATACAGGATGCTACC-----  |           | -----TCTG             | 0.71          | 0.83  | 0.69   | 0.70  | 0.41    | 0.70  |
| TATACAGGATGCTACCGTA    | TA        | CTAGGGTAAGACACCTCTG   | 0.26          | 0.25  | 0.21   | 0.24  | 0.40    | 0.21  |
| TATACAGGATGCTACCGTA    |           | -----GTAAGACACCTCTG   | 0.40          | 0.38  | 0.38   | 0.38  | 0.36    | 0.38  |

Supplementary Table 3. The top twenty mutated *CD4* alleles after CRISPR/Cas9 treatment and NGS. The values presented here are the mean percentages of each junction normalized to total read count. n=3 Blue = gRNA, Green = PAM, Red = inserted sequence.

| ESR1 Proximal Junctions         |           |                              |                  |                  |
|---------------------------------|-----------|------------------------------|------------------|------------------|
| Left Alignment                  | Insertion | Right Alignment              | siCTRL           | siPOLD2          |
| AGAGACGGGGAAAG <b>CCAAAC</b>    |           | <b>GACACAATGAGCGTTCTCA</b>   | <del>29.26</del> | <del>39.90</del> |
| AGAGACGGGGAAAG <b>CCAAAC</b>    |           | <b>GACACAATGAGCGTTCTCA</b>   | 29.26            | 39.90            |
| AGAGACGGGGAAAG <b>CCAAAC</b>    |           | <b>GACACAATGAGCGTTCTCA</b>   | 14.59            | 8.46             |
| AGAGACGGGGAAAG <b>CCAAAC</b>    | <b>G</b>  | <b>GACACAATGAGCGTTCTCA</b>   | 6.22             | 4.23             |
| AGAGACGGGGAAAG <b>CCAA</b> ---- |           | ----- <b>TGAGCGTTCTCA</b>    | 5.44             | 6.46             |
| AGAGACGGGGAAAG <b>CCAAAC</b>    |           | ----- <b>AATGAGCGTTCTCA</b>  | 5.38             | 3.54             |
| AGAGACGGGGAAAG <b>CCAA</b> ---- |           | <b>GACACAATGAGCGTTCTCA</b>   | 1.69             | 2.56             |
| AGAGACGGGGAAAG <b>CCAAAC</b>    |           | -- <b>ACACAATGAGCGTTCTCA</b> | 1.48             | 1.35             |
| AGAGACGGGGAA-----               |           | <b>GACACAATGAGCGTTCTCA</b>   | 1.38             | 1.14             |
| AGAGACGGGGAA-----               |           | <b>GACACAATGAGCGTTCTCA</b>   | 1.22             | 1.25             |
| AGAGACGGGGAAAG <b>CCAAAC</b>    | <b>T</b>  | <b>GACACAATGAGCGTTCTCA</b>   | 1.15             | 1.17             |
| AGAGACGGGGAAAG-----             |           | -- <b>ACACAATGAGCGTTCTCA</b> | 1.04             | 0.65             |
| AGAGACGGGGAAAG <b>CCAAA</b> --  |           | <b>GACACAATGAGCGTTCTCA</b>   | 1.01             | 0.69             |
| AGAGACGGGGAAAG <b>CCAAAC</b>    | <b>A</b>  | <b>GACACAATGAGCGTTCTCA</b>   | 1.00             | 0.70             |
| AGAGACGGGG-----                 |           | <b>GACACAATGAGCGTTCTCA</b>   | 0.81             | 1.15             |
| AGAGACGGGGAAAG <b>CCAAAC</b>    |           | ----- <b>GAGCGTTCTCA</b>     | 0.78             | 0.77             |
| AGAGACGGGGAAAG <b>CCAAA</b> --  |           | ----- <b>TGAGCGTTCTCA</b>    | 0.74             | 0.74             |
| AGAGACGGGGAAAG <b>CCA</b> ----- |           | ----- <b>CAATGAGCGTTCTCA</b> | 0.71             | 0.53             |
| AGAGACGGGGAAAG <b>CCA</b> ----- |           | <b>GACACAATGAGCGTTCTCA</b>   | 0.69             | 0.94             |
| AGAGACGGGG <b>GA</b> -----      |           | --- <b>CACAATGAGCGTTCTCA</b> | 0.63             | 0.68             |
| AGAGACGGGGAAAG <b>CCAAAC</b>    | <b>GA</b> | GACACAATGAGCGTTCTCA          | 0.62             | 0.47             |
| AGAGACGGGGAAAG <b>CCAAAC</b>    |           | -----29bp                    | 0.59             | 0.26             |

Supplementary Table 4. The top twenty mutated *ESR1* alleles after CRISPR/Cas9 treatment and NGS. The values presented here are the mean of percentages of each junction normalized to total read count. n=3 Blue = gRNA, Green = PAM, Red = inserted sequence.

| Gene product     | Oligonucleotide primer sequences (5'-3') |                          |
|------------------|------------------------------------------|--------------------------|
|                  | Forward                                  | Reverse                  |
| CD4 break        | GCTTGAGGGACCAGAGAGC                      | TGATTCCCATACTCAGCGCC     |
| CD4 reference    | AGAAGAGGCAAGGGGCATTC                     | GCTCCCTGTGTCTGTGTCTG     |
| GAPDH            | ACCCACTCCTCCACCTTTGA                     | CATACCAGGAAATGAGCTTGACAA |
| LIG3             | GAACGATAAGCAGATTGTGAAGC                  | GGGAAAGACTTGCTCTGCTC     |
| POLB             | GTTTGCCAGCTTCCCAGTAA                     | AAACCCTTTTCTAGGGCATGA    |
| POLD2            | TCCAAATGAGACCCTTCCTG                     | CCACACAGCACTTCTCCTCA     |
| POLQ             | GGAGGTGGAGGTGATTCTGA                     | CTGCTGCTTCCCTTTCAGTT     |
| <i>CD4</i> gRNA  | TACAGGATGCTACCGTACTA                     |                          |
| <i>CD71</i> gRNA | ACTAGCATTGTGATCGATTC                     |                          |
| <i>ESR1</i> gRNA | AACGACACAATGAGCGTTCT                     |                          |

Supplementary Table 5. Primer sequences used for quantitative real-time PCR and gRNA for CRISPR/Cas9.



|                                                                           |                                       |                                       |                 |                  | Microhomology                        |                                       |
|---------------------------------------------------------------------------|---------------------------------------|---------------------------------------|-----------------|------------------|--------------------------------------|---------------------------------------|
|                                                                           | Frequency of rearrangements           | Proportion of deletions               | Deletion length | Insertion length | 0 bp                                 | ≥ 3 bp                                |
| POLD1 knockdown<br>(% change relative to Wild-type)                       | Decreased<br>$p = 0.0089$<br>(-26.4%) | Decreased<br>$p = 0.0002$<br>(-2.37%) | ns              | ns               | Increased<br>$p < 0.0001$<br>(2.05%) | Decreased<br>$p < 0.0001$<br>(-2.44%) |
|                                                                           |                                       | Complementation                       |                 |                  |                                      |                                       |
| POLD1 Wild-type<br>(% change relative to Wild-type)                       | Yes<br>(0)                            | Yes<br>(0.18%)                        | n/a             | n/a              | Yes<br>(0.74%)                       | Partial<br>(-1.08%)                   |
| POLD1 D316G.<br>exonuclease<br>mutant<br>(% change relative to Wild-type) | No<br>(-24.7%)                        | Yes<br>(-0.95%)                       | n/a             | n/a              | No<br>(1.70%)                        | No<br>(-2.74%)                        |
| POLD1 del605S,<br>synthesis mutant<br>(% change relative to Wild-type)    | No<br>(-27.1%)                        | No<br>(-2.14%)                        | n/a             | n/a              | No<br>(1.27%)                        | No<br>(-2.19%)                        |

Supplementary Table 6. Statistics from Hi-FIBR analysis of intrachromosomal repair with siPOLD1 and complementation.

|                                                                              | Frequency of rearrangements           | Intrachromosomal                      |                                         |                  |                                       |                                       |
|------------------------------------------------------------------------------|---------------------------------------|---------------------------------------|-----------------------------------------|------------------|---------------------------------------|---------------------------------------|
|                                                                              |                                       | Proportion of deletions               | Deletion length                         | Insertion length | Microhomology                         |                                       |
|                                                                              |                                       |                                       |                                         |                  | 0 bp                                  | ≥ 3 bp                                |
| siPOLD2<br>(% change relative to Wild-type)                                  | Decreased<br>$p < 0.0001$<br>(-51.7%) | Decreased<br>$p < 0.0001$<br>(-8.04%) | Decreased<br>$p = 0.0017$<br>(-1.39 bp) | ns               | Increased<br>$p < 0.0001$<br>(5.96%)  | Decreased<br>$p < 0.0001$<br>(-3.38%) |
| siPOLQ<br>(% change relative to Wild-type)                                   | ns<br>(-10.1%)                        | ns<br>(-2.45%)                        | ns                                      | ns               | Increased<br>$p = 0.0456$<br>(1.59%)  | Decreased<br>$p < 0.0001$<br>(-3.42%) |
| siLIG3<br>(% change relative to Wild-type)                                   | Decreased<br>$p = 0.0001$<br>(-26.9%) | Increased<br>$p < 0.0001$<br>(4.91)   | ns                                      | ns               | Decreased<br>$p < 0.0001$<br>(-2.93%) | Increased<br>$p = 0.0002$<br>(2.44%)  |
| siLIG3 + siPOLD2<br>(relative to siLIG3)<br>(% change relative to Wild-type) | Decreased<br>$p = 0.0135$<br>(-31.9%) | Decreased<br>$p = 0.0002$<br>(-4.00)  | ns                                      | ns               | Increased<br>$p < 0.0001$<br>(4.43%)  | Decreased<br>$p < 0.0001$<br>(-3.51%) |

Supplementary Table 7. Statistics from Hi-FIBR analysis of intrachromosomal repair with siPOLD2, siPOLQ, and siLIG3.

# Figure S1

A

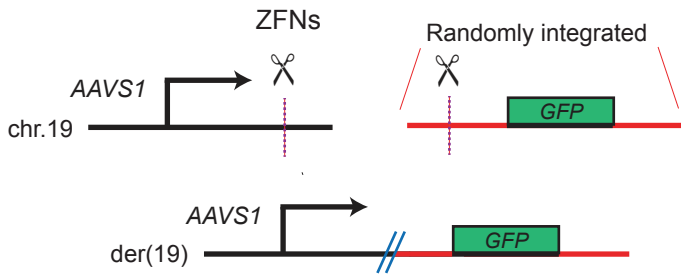

B Endogenous loci:

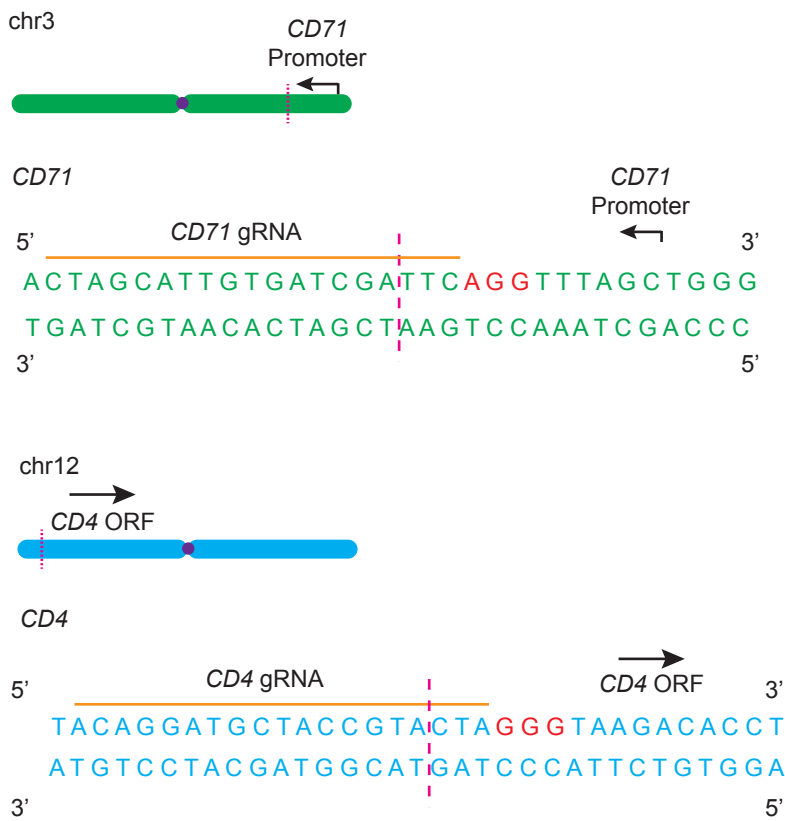

Translocation:

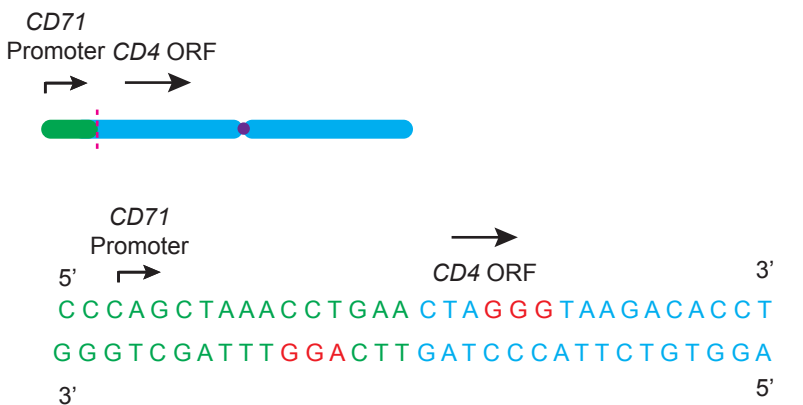

C Cell cycle distribution in 293T cells

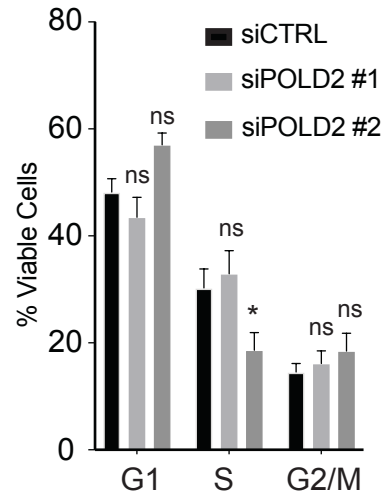

Figure S2

Single antibody PLA controls:

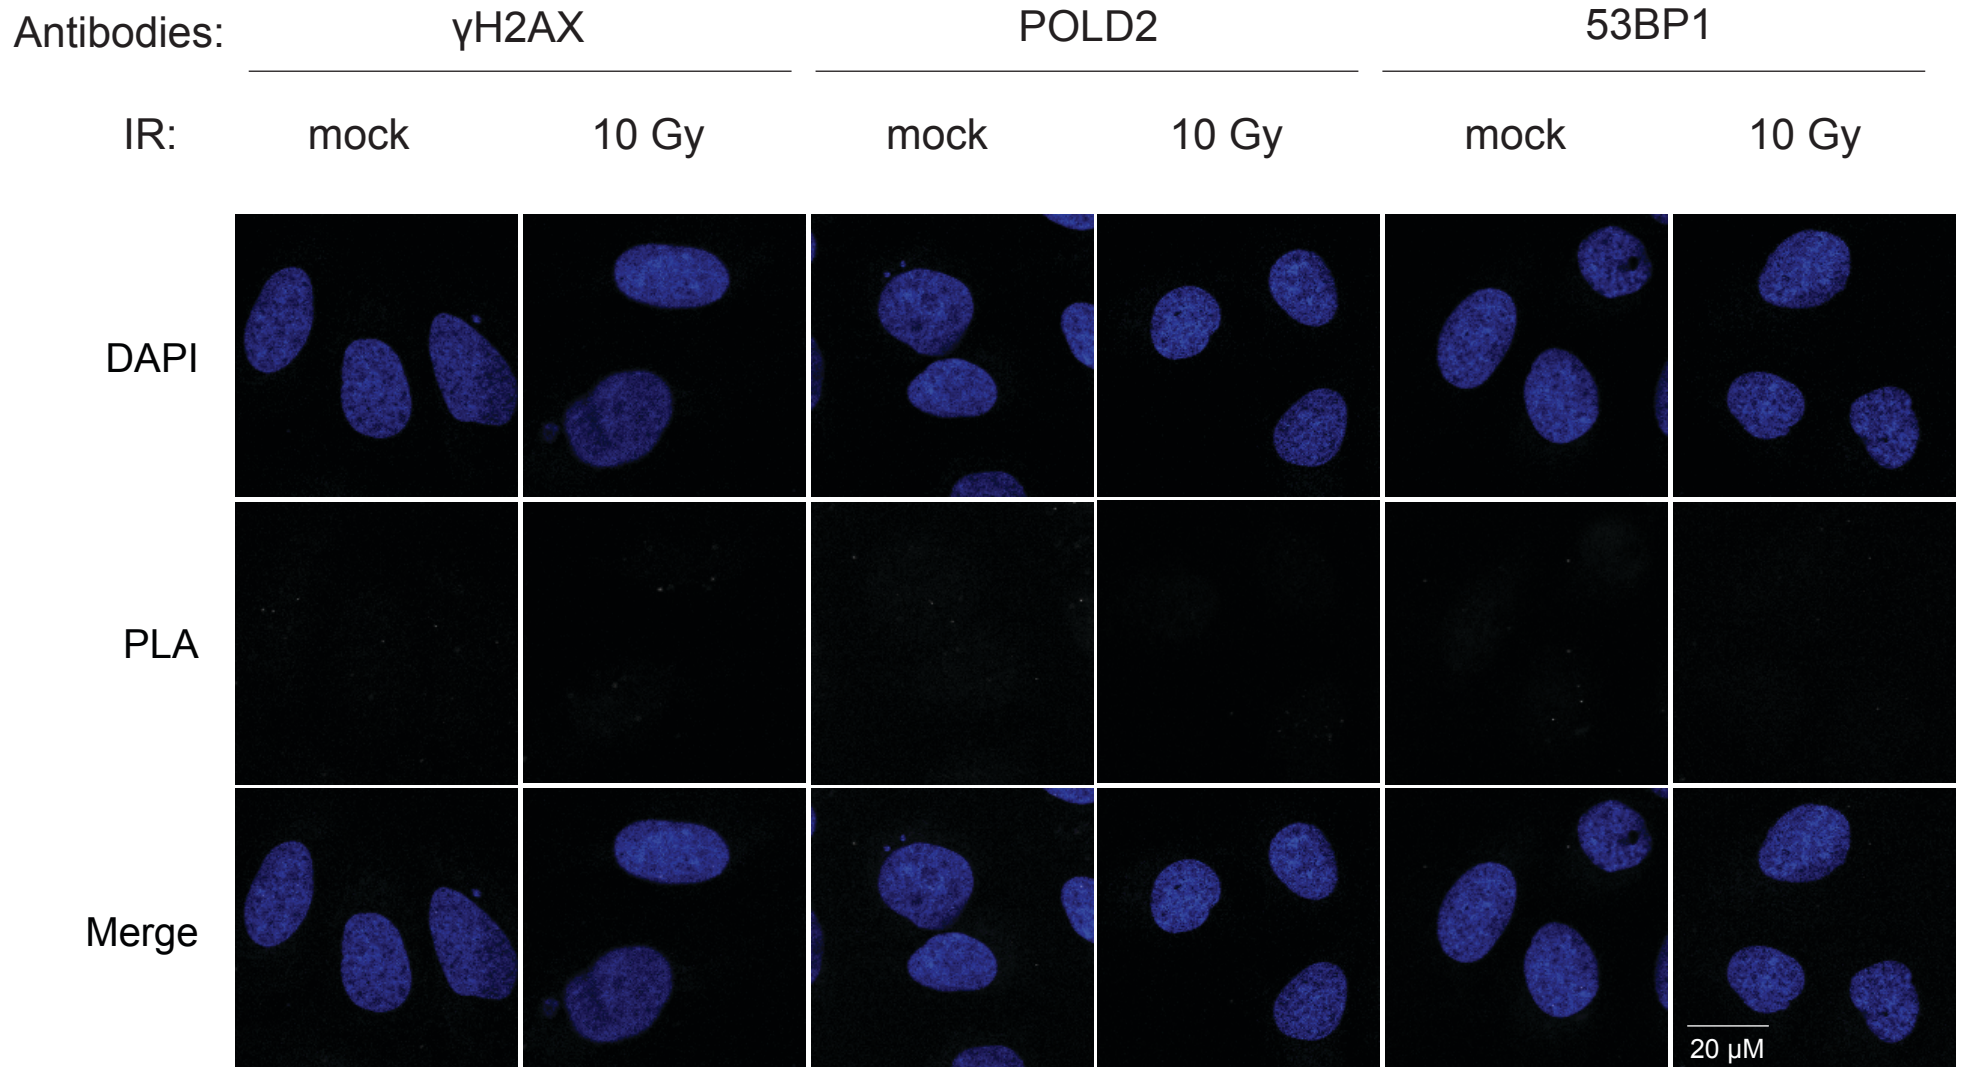

Figure S3

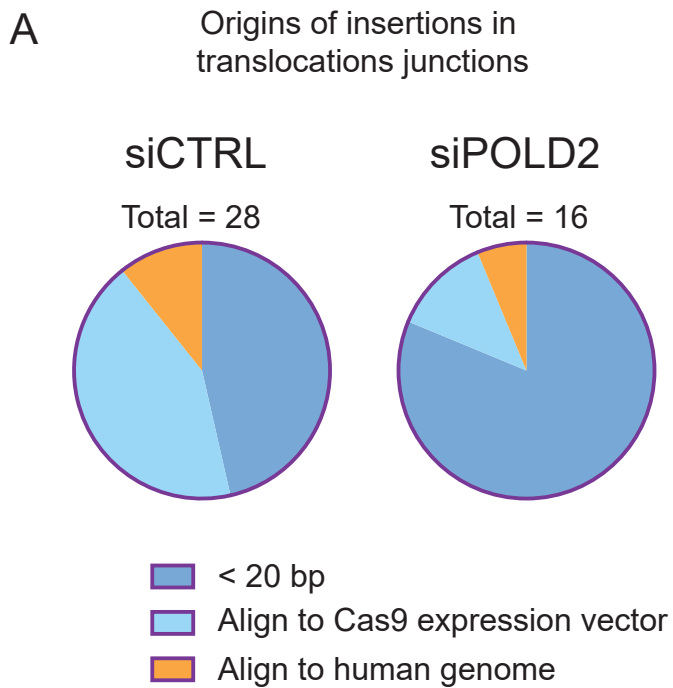

**B** Deletion length in *CD4/CD71* translocations

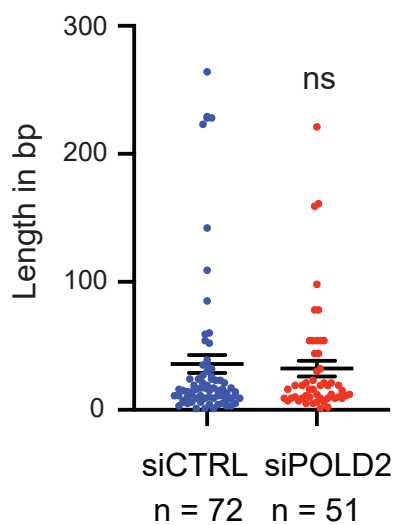

**C** Microhomology usage at *CD4* translocations

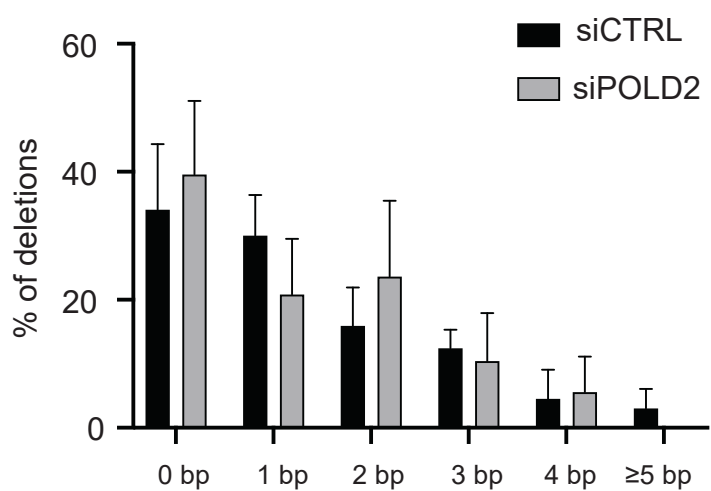

# Figure S4

PCR in the linear range of  
repair junctions

Primer Set: — *CD4* —      — *ESR1* —  
Cycles: 20 23 26 29 32      20 23 26 29 32

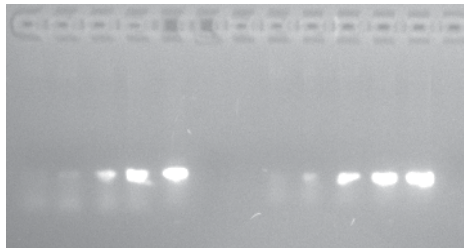

Figure S5

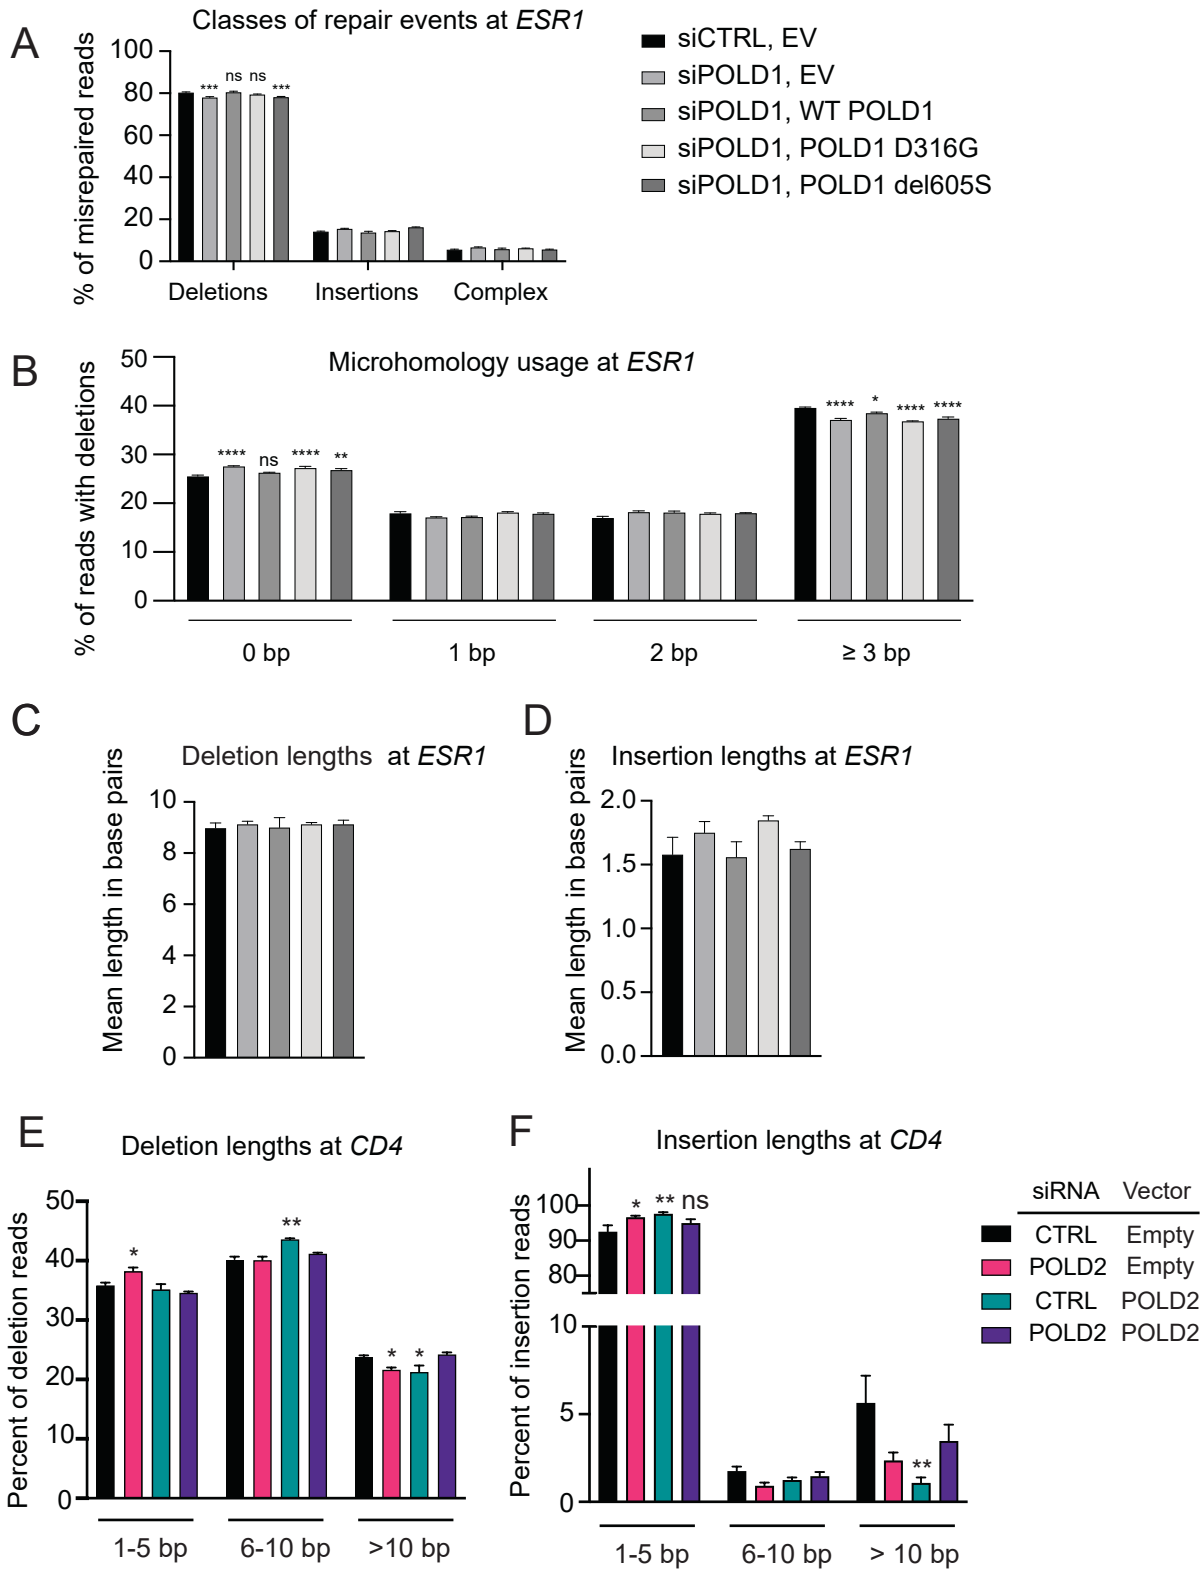

Figure S6

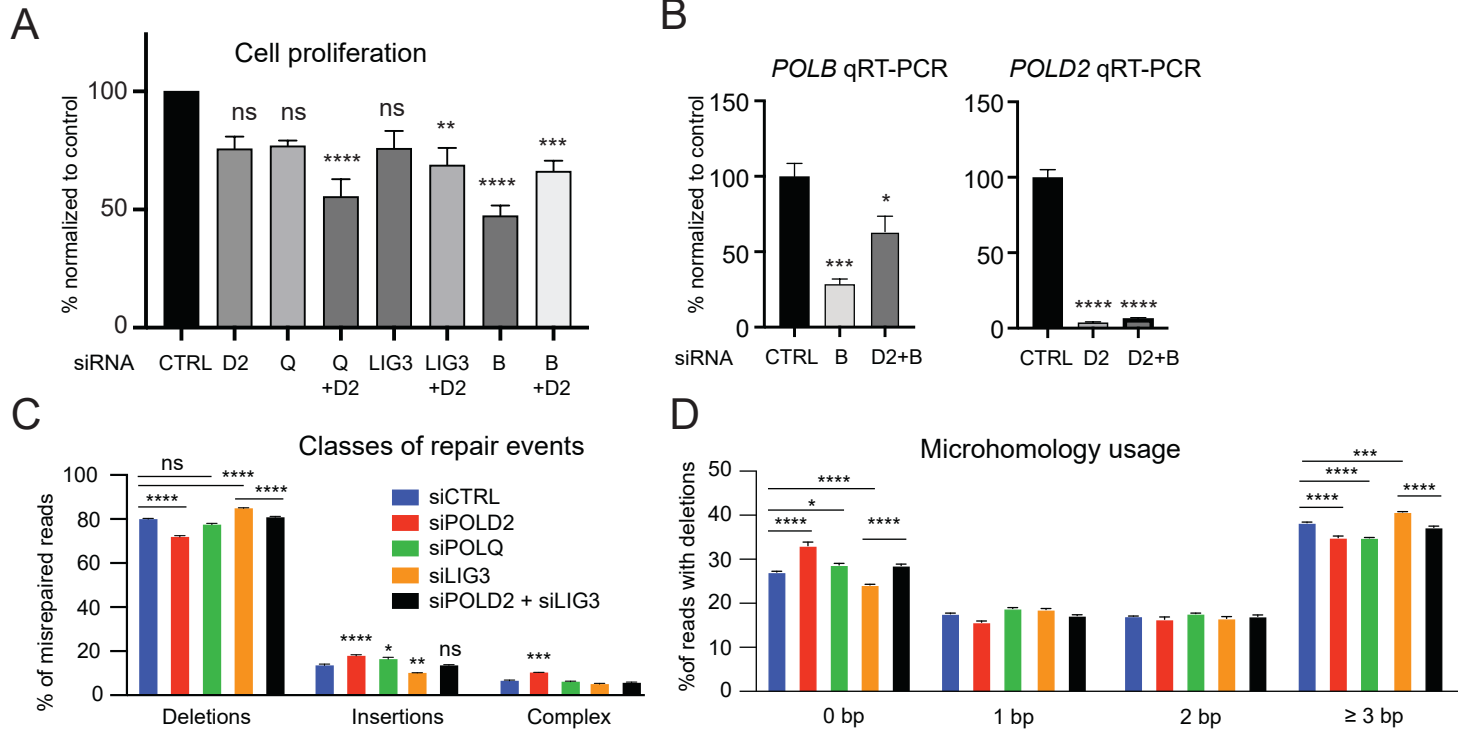

Supplement: pnas.2014176117.sapp.pdf [file pnas.2014176117.sapp.pdf]
